1 **Diversity and distribution of the coral-associated endolithic algae *Ostreobium* in the**  
2 **Southwestern Caribbean**

3  
4 Rodríguez-Bermúdez, A.P., .S., Ramírez-Palma, Giraldo-Vaca, J.S., Diaz-Puerto, L.M., &  
5 Sánchez, J.A.\*

6  
7 Laboratorio de Biología Molecular Marina (BIOMMAR), Departamento de Ciencias Biológicas-  
8 Facultad de Ciencias, Universidad de los Andes, Bogotá, Colombia

9 \* Corresponding author [juansanc@uniandes.edu.co](mailto:juansanc@uniandes.edu.co)

10  
11 Adriana Rodríguez-Bermúdez [0000-0003-1486-4136](https://orcid.org/0000-0003-1486-4136)

12 Shaliny Ramírez-Palma [0009-0000-4588-0142](https://orcid.org/0009-0000-4588-0142)

13 Juan Sebastián Giraldo Vaca [0000-0002-9855-732X](https://orcid.org/0000-0002-9855-732X)

14 Laura María Diaz [0009-0007-5361-3811](https://orcid.org/0009-0007-5361-3811)

15 Juan A. Sánchez [0000-0001-7149-8369](https://orcid.org/0000-0001-7149-8369)

16  
17  
18 **Abstract**

19  
20 Coral reefs are facing significant environmental challenges. Ocean acidification has the potential  
21 to induce the dissolution of coral reefs. The community of micro-bioerosion exhibits a heightened  
22 level of concern in the context of ocean acidification. Comprehending the close interplay between  
23 bioeroders and corals is of utmost importance in predicting the trajectory of these vulnerable  
24 ecosystems. The genus *Ostreobium*, which belongs to the order Bryopsidales (Chlorophyta) and  
25 comprises euendolithic chlorophyte algae, has been identified as the primary cause of reef  
26 dissolution among microbioeroders. The objective of this study was to comprehend the inherent  
27 distribution of *rbcL* clades of *Ostreobium* in the Southwestern Caribbean corals within a gradient  
28 of reef depth. The *Ostreobium rbcL* variants were found to be linked with corals belonging to the  
29 Agariciidae, Merulinidae, Poritiidae, Siderastreidae, Astroconeidae, Montastreidae, Mussidae,  
30 and Pocilloporidae families. The individuals selected for the current investigation are categorized  
31 as members of either the "complex" or "robust" coral groups. Our findings indicate that solely the

32 corals categorized as 'complex' exhibit close memberships with the three *Ostreobium* superclades.  
33 In general, the dispersion of *Ostreobium* within the Southwestern Caribbean region exhibits  
34 differentiation among various coral groups and is influenced by geographical and bathymetric  
35 factors. The *Ostreobium*'s diversity is primarily composed of ecological specialists, wherein most  
36 clades are linked to particular hosts. Conversely, only a few ecological generalists are associated  
37 with multiple hosts, akin to zooxanthellae. *Ostreobium* exhibits greater diversity on encrusting  
38 corals such as agariciids, which are among the most abundant and widespread coral species in the  
39 Caribbean.

40

41 **Keywords:** Endolithic algae, biodiversity, coral-host associations, Caribbean, microbioerosion.

42

43

## 44 **INTRODUCTION**

45

46 Coral reefs are under unprecedented environmental threats. Ocean thermal anomalies cause coral  
47 bleaching and mortality (Hughes et al. 2003; Eakin et al. 2010) and ocean acidification has a  
48 negative impact on the calcification rates of marine organisms such as corals (Orr et al. 2005;  
49 Hoegh-Guldberg et al. 2007). This process interacts with the human footprint, specifically  
50 growing sewage and overexploitation, reducing the resilience of marine ecosystems like coral  
51 reefs (Graham et al. 2008, 2013; Wiedenmann et al. 2013). Particularly, ocean acidification may  
52 cause reef dissolution (Hoegh-Guldberg et al. 2017). Scleractinian corals, the main reef-building  
53 organisms, had already shown a decrease in calcification rates (De'ath et al. 2009) in response to  
54 a reduction in  $\Omega_{\text{arag}}$  saturation (Fantazzini et al. 2015). Of particular concern, the micro-  
55 bioerosion community increases under conditions of ocean acidification (Enochs et al. 2015).  
56 Understanding the tight interaction between bioeroders and corals is critical for forecasting the  
57 future of these fragile ecosystems.

58

59 The euendolithic chlorophyte algae genus *Ostreobium*, a siphonous green algae from the order  
60 Bryopsidales (Chlorophyta), is the most prevalent agent responsible for reef dissolution among  
61 microbioeroders (Tribollet 2008; Tribollet et al. 2009; Grange et al. 2015). *Ostreobium* has also  
62 gained popularity due to its ability to undertake low-light photosynthesis, which allows it to

63 spread further into the depths (Rouzé et al., 2021; Verbruggen & Tribollet, 2011). Furthermore,  
64 the presence of chlorophyll b and lutein in *Ostreobium* has perplexed scientists given the absence  
65 of these pigments in the most common group of endosymbiotic dinoflagellate Symbiodinaceae  
66 (Jeffrey 1968a, 1968b; Apprill et al. 2007). The adaptive ecophysiology of *Ostreobium* is related  
67 to the rocky and harsh environment in which it dwells (Ricci et al. 2019), its interaction with the  
68 coral holobiont during bleaching events (Fine et al. 2004, 2006a; Galindo-Martínez et al. 2022)  
69 and a closed connection to coral tissues at mesophotic depths (Gonzalez-Zapata et al. 2018b).  
70 Whereas those research opportunities and challenges have been addressed to some extent, the  
71 distribution of individual genotypes in natural habitats remains poorly understood (Tandon et al.,  
72 2023). It plays a dynamic role within the skeleton of scleractinian corals (Bornet and Flahault  
73 1889a), but limited information exists on aspects as important as their substrate preference or role  
74 as symbiont (Kobluk and Risk 1977; Grange et al. 2015). During bleaching, heat stress, and  
75 disease events, *Ostreobium* utilises coral metabolic waste to translocate fixed carbon to the coral  
76 host, indicating a clear transition from a commensalistic to a mutualistic relationship (Fine and  
77 Loya 2002; Fine 2005; Fine et al. 2006b). A mutualistic relationship with bioeroders such as  
78 *Ostreobium* may allow corals to coexist with bioerosion.

79  
80 A defining trait of reef-building coral species is the ensemble of symbiotic linkages with a  
81 microbial community, which plays a crucial role in determining the robustness of its coral host  
82 and, by extension, the ecosystem (Bourne et al. 2016; Peixoto et al. 2017). While the symbiosis  
83 between corals and zooxanthellae is the most well-studied within the coral holobiont, the  
84 dynamics of other microorganisms, such as those inhabiting the coral skeleton, have received  
85 little attention (Försterra and Häussermann 2008). Taxonomically, *Ostreobium* has three valid  
86 species: *O. queketii* (Bornet and Flahault 1889b), 1889, *O. constrictum* (Lukas 1974), *O. reineckii*  
87 (Bornet and Flahault 1889b). However, only a few morphological characters are diagnostic,  
88 limiting morphological approaches and making species differentiation difficult. A recent study  
89 that used the *rbcL* barcode identifier discovered more species than previous taxonomic literature  
90 indicated (Gutner-Hoch and Fine 2011). Since then, the molecular data obtained through the  
91 sequencing of plastid encoded markers such as *rbcL*, *tufA*, UPA, and 16S rRNA increased and  
92 allowed us understand better the prevalence of *Ostreobium* in the core microbiome of tropical  
93 corals, along with its extensive genetic diversity (Gutner-Hoch and Fine 2011; Marcelino and

94 Verbruggen 2016; del Campo et al. 2017; Gonzalez-Zapata et al. 2018b). Until now, we are  
95 grasping on to the natural distribution of *Ostreobium* diversity. It is potentially associated in  
96 nearly 85% of coral species (Gutner-Hoch and Fine 2011), on a wide geographical range (del  
97 Campo et al. 2017) and bathymetric range (deepest record at 172 m, (Rouzé et al. 2021). Here,  
98 we seek to understand the natural distribution of *rbcL* clades of *Ostreobium* in the Southwestern  
99 Caribbean in a reef depth gradient.

100

## 101 METHODS

102

### 103 Field sampling

104

105 We collect 200 coral samples at two localities in the Colombian Caribbean: Cartagena de Indias  
106 and San Andres Island between December 2019 and March 2020, and during the months of  
107 March 2021 and 2022 (Fig. 1). Subsamples of 1cm<sup>2</sup> were preserved in ETOH 96% and stored at -  
108 80°C until DNA extraction. The coral colonies were identified using the taxonomic keys of  
109 (Veron 2000; Wells). A dry voucher is available at the Museo de Historia Natural Uniandes  
110 (Supplementary Table 1). Research and collection of specimens were approved by the National  
111 Environmental Licensing Authority (ANLA, Spanish acronym): Collection Framework  
112 Agreement granted to Universidad de los Andes through resolutions No. 02215 of 8<sup>th</sup> November  
113 2019, and agreements with Parques Nacionales and Oceanario-CEINER Islas del Rosario  
114 (Observatorio de Microbioerosion Marina), 2022.

115

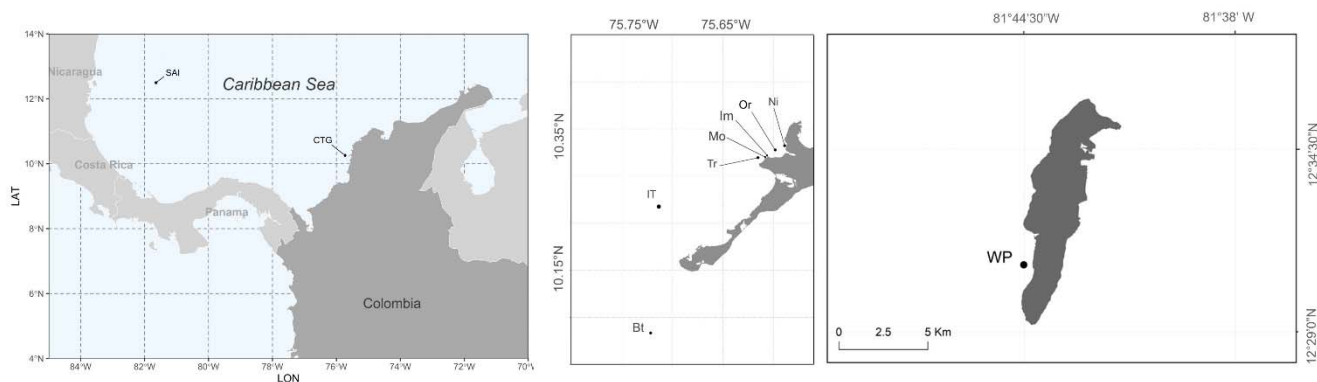

116 **Figure 1. Sampling localities.** Study area in the Colombian Caribbean. Stations at Cartagena de  
117

118 Indias (CTG): Ni = Nico, OR = Octubre Rojo, Tr = Trompadas, Mo = Montañita, Im = Imelda,  
119 IT = Isla Tesoro, Bt = Bajo Tortugas; San Andres Island (SAI): WP = Western Point.

120

## 121 **Molecular detection of *Ostreobium***

122

123 To prepare the sample for DNA extraction, we washed a small part of the coral colony (~0.5cm<sup>2</sup>)  
124 preserved in ETOH 96% with a WaterPick© using a pressurized jet of MiliQ water to remove the  
125 coral tissue. Then, we exposed the green band in the skeleton belonging to the *Ostreobium* algae  
126 community with a MotorTool and powder grounded using a mortar and pestle. Finally, we  
127 proceed to extract DNA following the CTAB protocol used in (Cremen et al. 2016).

128

## 129 ***rbcL* Amplification**

130

131 We amplified a ~430bp fragment of the chloroplast encoded *Ostreobium* *rbcL* gene using the  
132 primers: *rbcL*250 [5'GATATTGARCCTGTTGTTG GTGAAGA 3'] and *rbcL*R670 [5'  
133 CCAGTTTCAGCTTGWGCTTTATAAA 3'] (Massé et al. 2020). We adjust the PCR reactives to  
134 following: 15ul reaction containing 3ul[5X] OneTaq reaction buffer, 0.6ul of 10mM forward and  
135 reverse primes, 0.3ul [1 U] One Taq DNA polymerase (Biolabs, USA), 0.3 [10mM] DNTPs, 2.1  
136 [1.5mM] MgCl<sub>2</sub>, 0.75ul[20mg/ul] BSA, 6.35 Milli Q water and 1ul[30ng] template DNA. The  
137 PCR conditions were denaturation at 94°C for 2min, annealing for 35 cycles at 94°C for 90s,  
138 55°C for 90s and 72°C for 60s-, and 5-min extension at 72°C. We visualized the amplified  
139 fragments in 1.5% agarose gel with SYBR™Gold. PCR products were cleaned with FastAP  
140 Thermosensitive Alkaline Phosphatase and sequenced using the BigDye Terminator v3.1 Cycle  
141 Sequencing Kit (Applied Biosystems) on the AD1373xl DNA Analyzer (Applied Biosystems).  
142 Finally, we sent the positive PCR products to GenCore lab to do Sanger sequencing. Out of 200  
143 samples, a total of 115 samples amplified for the *rbcL* gene, 63 sequences had enough quality to  
144 perform further phylogenetic analysis (31% of the samples). Both ML and Bayesian consensus  
145 trees conserved the same topologies, only Bayesian inferred tree was shown (Figure 2.A).

146

## 147 **Phylogenetic analysis**

148

149 We aligned new sequences accession numbers from OQ935479 to OQ935534 (Supplementary  
150 Table 1), NCBI *Ostreobium rbcL* sequences from previous studies (Supplementary Table 2), and  
151 two outgroups from the Bryopsidales order used by (Iha et al. 2021). The multiple sequence  
152 alignment was performed using the ClustalW algorithm in MEGA11 (Kumar et al. 2018). We  
153 estimated maximum likelihood trees in RAXMLv8(Stamatakis, 2014) using the GTR model and  
154 1000 bootstrap replicates. We also estimated ultrametric Bayesian trees using BEAST v2.5. We  
155 used JModelTest2 (Darriba et al. 2012) to estimate the best fitting substitution model according  
156 to the corrected Akaike information criterion (Lukas 1974; Sugiura 1978). In BEAST, we applied  
157 the resulting TrN+I+G model, an Optimised Relaxed Clock, Birth Death Model of speciation  
158 prior, and ran analyses for 10 million Markov chain Monte Carlo (MCMC) generations. We  
159 confirmed the resulting .log files in TRACER v1.4 (Drummond and Rambaut 2007), and found  
160 that each analysis reached stationarity and had effective sample size (ESS) values >200. Finally,  
161 we discarded the first 5000 trees (10%) as burn-in. Resulting trees were annotated in  
162 TreeAnnotator.

163

## 164 **Clades delimitation**

165

166 We implemented the two following methods to identify *Ostreobium* clades: a generalized mixed  
167 Yule coalescent model using the function gmyc in the R package Splits (Fujisawa and  
168 Barraclough 2013) and the coalescent Poisson tree process (bPTP) with Bayesian support (BS)  
169 method (Zhang et al. 2013) with the parameters 100.000 MCMC generations and a 0.1 burn-in  
170 factor. To avoid the hyperinflation and complex interpretation of PTP and GMYC methods in  
171 delimiting single-gene trees , we interpreted the resulting clades alongside ecological features  
172 such as geography and depth, and named according previous studies(Gutner-Hoch and Fine  
173 2011; Gonzalez-Zapata et al. 2018b; Massé et al. 2020). Consensus trees were visualized and  
174 modified in FigTree v1.4.4. and iTOL website (<https://itol.embl.de/>).

175

176

## 177 **RESULTS**

178

### 179 *Phylogeny of the Southwestern Caribbean *Ostreobium**

180  
181  
182  
183  
184  
185  
186  
187  
188  
189  
190  
191  
192  
193  
194  
195  
196  
197  
198  
199  
200  
201  
202  
203  
204  
205

Phylogenetic analyses of the chloroplast *rbcL* region (~ 410 bp) revealed a community of 20 well-supported clades. 15 new clades reported in the present study (clades A2, B3, E1, E2, E3, E4, E5, L1, P4c, P6c, Q, R1, R2, R3, R4) and three new reports for the Colombian Caribbean region (clades A, F and G) (Figure 2.A).

### ***Geographical structure of *Ostreobium****

The principal clades of *Ostreobium* were structured by geography. Clade OstA comprises worldwide clades, while clade OstB includes clades from the Red-Sea and the Caribbean. Finally, clade OstC is almost exclusively composed of Colombian Caribbean clades, except for one genotype from the Red Sea (See also Supplementary Figure A). Within clade OstC, we found geographical structure by locality (SAI or CTG). In terms of location specificity and dominance, only the clades A, E, F, I and Q were shared between CTG and SAI. The clades E3, M and N are abundant and only found at SAI. At CTG, 14 clades are exclusive of this location, increasing the reported diversity of *Ostreobium* to 20 different clades, making it the most diverse locality.

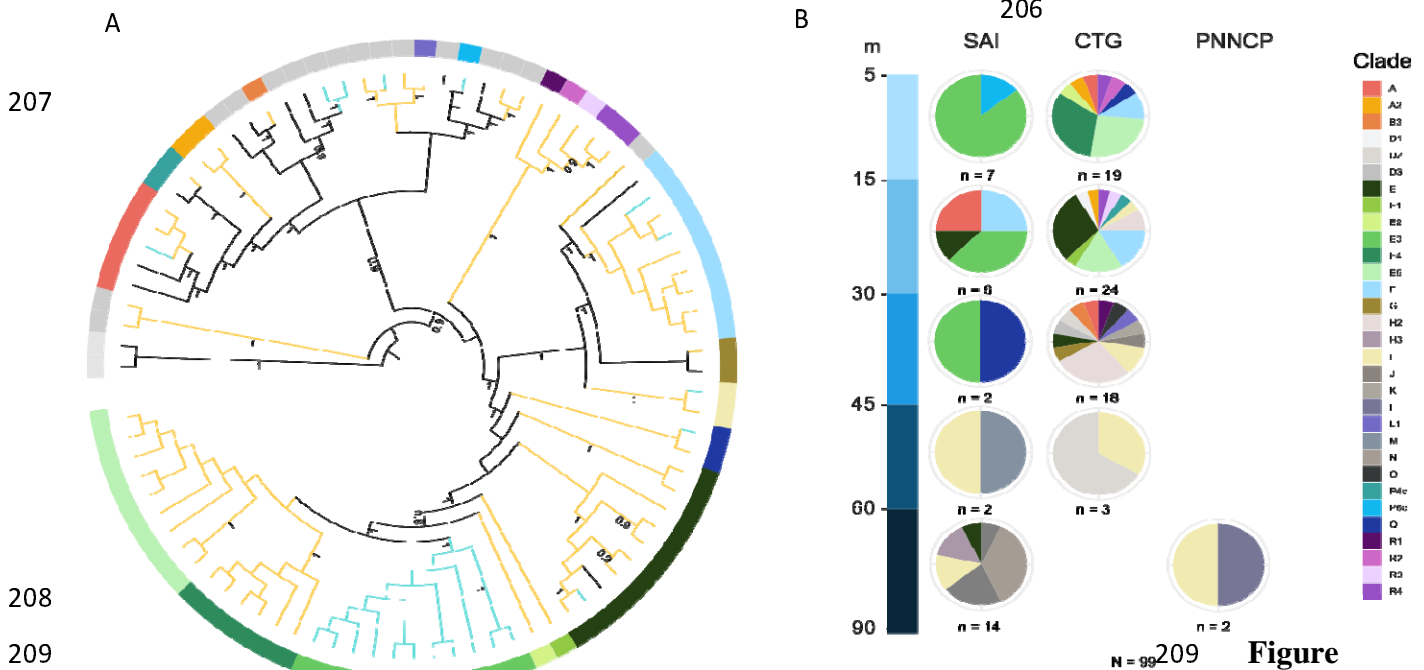

207  
208  
209  
210 **2. A.** Summarized 210 in *rbcL* clades bayesian phylogenetic tree of  
211 *Ostreobium*. Bootstrap values > 0.8 are shown. Branch colors correspond to localities in the  
212 Caribbean: cyan color (SAI), orange yellow (CTG), and black to other locations outside the  
213 Caribbean. The circle band outside the tree indicates the species delimitation, light-gray color at  
214 the band correspond to *rbcL* clades identified in previous studies. (See details in Supplementary  
215 Table 2). **B.** Depth distribution of *Ostreobium rbcL* clades reported for the Colombian Caribbean.  
216 We included data from the National Natural Park Deep-Sea Corals (PNNCP) to analyze the  
217 genetic diversity outlook of *Ostreobium* in the Caribbean using metadata from Gonzalez-Zapata  
218 et al., (2018).

219  
220 ***Depth-structured patterns***

221  
222 Our results showed that all three ‘superclades’ OstA, OstB and OstC are represented at all the  
223 depth ranges of the analysis (present study and supplementary data from Gonzalez-Zapata et al.  
224 2018). However, figure 2.B. shows some depth-related distribution patterns: the ‘depth-  
225 generalists’ and ‘depth-specific clades’. Among the depth-generalists, we highlight the presence  
226 of clades E, E2, H2 and I, which are present from shallower waters (<30m) to mesophotic zones  
227 (30m - 90m). We also found clades A, A2, F, R2 and Q present across all the ranges but limited



228 until the upper mesophotic zone (<45m). While clades L1, E2, E4 and E5 are restricted to  
 229 shallow waters (<30m), clades L, M, N and H3 remain restricted to deeper zones (>30m), as  
 230 previously reported (FG2018). At CTG the depth range with higher diversity of *Ostreobium* is  
 231 the 30 to 45m depth with thirteen different clades, while in SAI, the depth most diverse range is  
 232 deeper (60 – 90 m) with five clades.

233

234 ***Ostreobium* hosts**

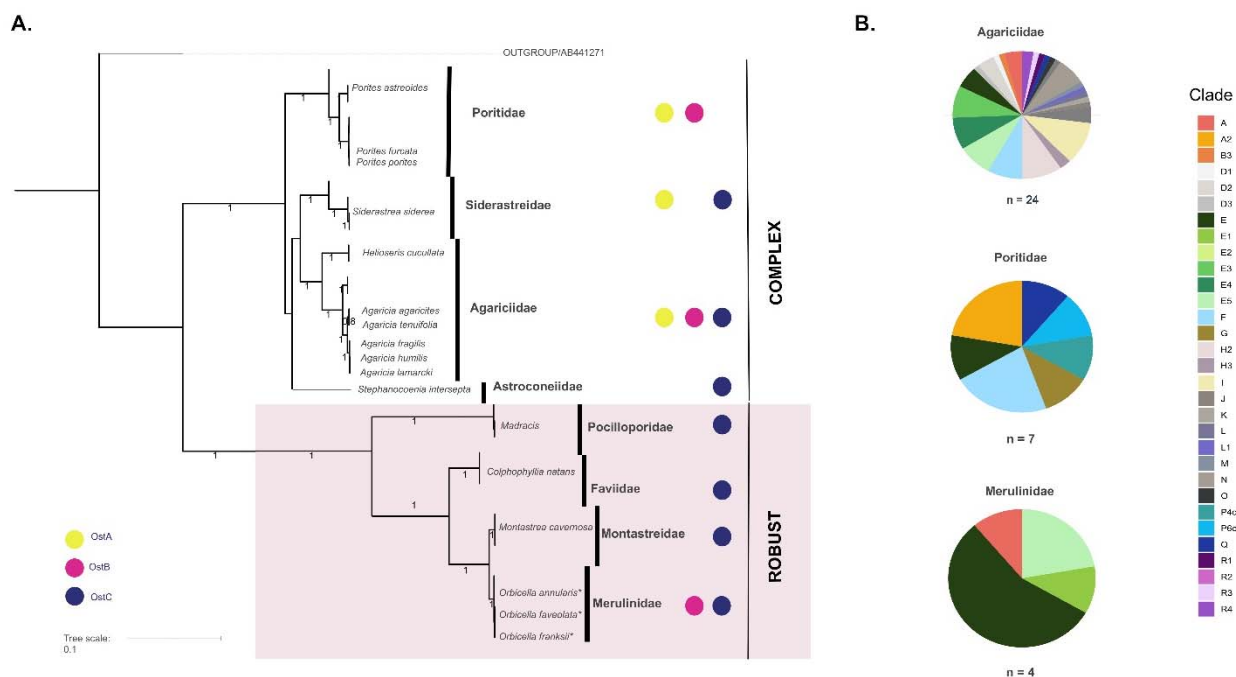

235

236 **Figure 3.A.** Distribution of *Ostreobium* principal clades in the coral families assessed in the  
 237 Colombian Caribbean based on *rbcL* sequences. The coral phylogenetic tree reconstructed from  
 238 selected data of the CO1 marker from (Kitahara et al. 2010). Only the coral species included in the  
 239 present study were annotated in the tree labels, species without CO1 information were assumed  
 240 to share the same phylogenetic position with species on the same genus. The three *Ostreobium*  
 241 superclades were labeled at the left corner. B. Scleractinian families with the highest number of  
 242 *Ostreobium* individual clades.

243 We successfully amplified *rbcL* *Ostreobium* types associated with corals from the families  
 244 Agariciidae, Merulinidae, Poritiidae, Siderastreidae, Astroconeidae, Montastreidae, Mussidae  
 245 and Pocilloporidae. The representatives of each in the present study belong to either ‘complex’ or

246 'robust' coral groups. We found that only 'complex' corals have associations with all three  
247 *Ostreobium* superclades, and the 'robust' corals mostly associate with OstC (Figure 3.A). We  
248 also found a high diversity associated to Agariciids (24 clades out of 31, 77% of known  
249 *Ostreobium* clades for the Colombian Caribbean), followed by Poritiids (7 out 31, 22%) and  
250 finally Meruliniids (4 out 31, 12%). While Agariciids are associated with the three superclades of  
251 *Ostreobium*, Poritiids are associated only with OstB and OstA, and Meruliniids are  
252 associated exclusively with OstC. So far, the clades I, E3 E4, E5, R4, H2, H3, M, N, O, and D are  
253 reported only in association with Agariciids despite locality and depths. Two new clades, namely  
254 P4c and P6c, have been identified exclusively in *Porites colonensis*. These clades are sister taxa  
255 of cultured strains isolated from Indo-Pacific Pocilloporids (See P4 and P6 clades at Massé et al.  
256 2018). Their position at the phylogenetic tree matches the findings reported in (Massé et al.  
257 2018), and also, are found in *Porites* colonies suggesting a possible relation between hosts and  
258 associated type of *Ostreobium*.

259

## 260 **DISCUSSION**

261 Our study reveals that the spatial distribution of *Ostreobium* in the Southwestern Caribbean  
262 exhibits differentiation across various coral groups and is subject to the influence of geographical  
263 and bathymetric factors. The concept of environmental heterogeneity in a coral-endosymbiont  
264 relationship, which encompasses variations in both biotic and abiotic factors across space and  
265 time, is widely recognized as a fundamental determinant of species richness patterns at various  
266 scales, spanning from local to continental levels (LaJeunesse and Thornhill 2011; Grajales and  
267 Sanchez 2016). *Ostreobium* diversity depends on the location and symbiont availability (del  
268 Campo et al., 2017). The study presented additional empirical support indicating that various  
269 rbcL clades (A, F, G, I, and E) exhibit a wider distributional range due to the vast expanse of the  
270 Caribbean and Red Sea, which are major marine basins situated in the Atlantic and Indian  
271 Oceans, respectively. Moreover, the aforementioned clades exhibit distinct depth structures and  
272 varying relationships with numerous hosts.

273

## 274 **Geographic and depth zonation**

275 Del Campo et al. (2017) indicated the presence of the three dominant *Ostreobium* groups defined  
276 by the 16S rRNA in the Caribbean. Similarly, we found three major clades OstA, OstB, OstC  
277 with similar distributions (Supplementary Figure 1). It could imply that the *rbcL* marker is a  
278 proxy for diversity and comparable to 16s RNA-generated topologies. So far, the *rbcL* marker  
279 has revealed the highest reported diversity for *Ostreobium* in the Caribbean region. Differences in  
280 clade composition between SAI and CTG locations can be attributed to the environmental  
281 heterogeneity among sites such as reef setting (oceanic: SAI vs continental influence: CTG), light  
282 regimens, turbidity and predators (Velásquez and Sánchez 2015), all of which have a direct  
283 impact on the physiology and population persistence of *Ostreobium*.

284 The 'insurance theory' could explain the distribution pattern of *Ostreobium* in Cartagena in  
285 particular. According to this idea, ecosystem stability is increased by diversity and functional  
286 redundancy due to complementarity and asynchronous reactions to stress (Loreau and de  
287 Mazancourt 2013). This idea is similar to the adaptive dysbiosis hypothesis in that  
288 microorganisms give resistance and improve host resilience due to functional redundancy  
289 (Boilard et al. 2020). Because *Ostreobium* is better adapted to extreme environments, it is not  
290 surprising to find higher clade diversity under the dim light conditions that characterize  
291 Cartagena reefs (Roitman et al. 2020), where continental run-off reduces the penetration of light  
292 (Gonzalez-Zapata et al. 2018a). Our findings in this regard contrast those of Symbiodiniaceae,  
293 where diversity depletion occurs on turbid zones (López-Londoño et al. 2021). These conditions  
294 are suitable for green algae like *Ostreobium*, increasing its diversity (del Campo et al. 2017).  
295 Presumably, some better adapted *Ostreobium* clades may replace some zooxanthellae functions  
296 in environments with stressful conditions, easing coral acclimation to bleaching stress and light  
297 scarcity. However, it is unclear how this diversity aids in the holobiont's adaptation to those  
298 specific conditions.

### 299 **The influence of Host species Identity**

300 In contrast to what del Campo et al. (2017) found at the Caribbean, our findings show that 'robust'  
301 corals are associated with fewer types of *Ostreobium* than 'complex' corals. While this estimation  
302 can be hindered by the large number of Agariciids samples, it can also tell us how the dominance  
303 of *rbcL* clades in the *Ostreobium* community of a particular sample can hide the cryptic

304 biodiversity that could be discovered with metabarcoding approaches that include other markers  
305 (such as 16S rRNA or *tufA*).

306  
307 Similar to zooxanthellae, *Ostreobium* diversity appears to be dominated by "ecological  
308 specialists" with the majority of clades associated with specific hosts, whereas few "ecological  
309 generalists" are associated with multiple hosts (Finney et al. 2010). *Ostreobium* is more diverse  
310 on encrusting corals such as agariciids, one of the most prevalent and prolific coral species in the  
311 Caribbean (Gonzalez-Zapata et al. 2018a). Also, agariciids exhibit greater resilience in disturbed  
312 habitats like Cartagena, exhibiting high rates of survival after bleaching events (Cáceres and  
313 Sánchez 2015; Navas-Camacho et al. 2015), and also is the coral form that inhabits by excellence  
314 the reef slope habitats characterized by low-irradiance regimens (Bongaerts et al. 2013; Prata et  
315 al. 2022). The diverse repertory of dominant *Ostreobium* clades found at Agariciids illustrates the  
316 importance of *Ostreobium* genetic pools in increasing their prevalence and resistance across wide  
317 geographic areas. Host species possibly have control on the composition of endolithic community  
318 via skeletal specialization (Marcelino et al. 2017). It is remarkable how different the diversity  
319 composition is in the most abundant hosts: while clade E is the most prevalent genotype  
320 associated with 'robust' corals at Cartagena (*Orbicella* spp. and Agariciids species). *Porites*  
321 species ('complex' corals) exhibited preferences for different and uncommon *Ostreobium*  
322 genotypes.

323  
324 The present study has presented a brief overview of the ecological expansion and diversification  
325 of *Ostreobium*. However, further investigation is warranted to explore the *Ostreobium*  
326 community profiles associated with a broader range of host species across varying optical  
327 characteristics of the water column. Despite recent investigations into the physiological responses  
328 of *Ostreobium* in diverse skeletal environments, the adaptive function of *Ostreobium* remains  
329 nascent in our comprehension. It is suggested that a proposed framework be employed to  
330 enhance the inherent adaptive capacity of coral reefs in response to climate change by  
331 investigating the function of supplementary coral holobiont entities, such as *Ostreobium*, as  
332 potential targets for adaptive intervention ((Voolstra et al. 2021).

333

## 334 **ACKNOWLEDGEMENTS**

335

336 We thank the BIOMMAR crew for the fruitful discussions during all the stages of this project. To  
337 Cartagena divers, Makarela and Sea Pride diving operators that supported us in the field. We  
338 especially thank Laura Rodriguez, Sandra Montaña, Andres Chilma, Adrian Devia, Adriana  
339 Sarmiento, and Carlos Gomez for being incredible dive buddies and great companionship during  
340 the field trip, to Sebastian Guzman for kindly sharing his evolutionary and bioinformatics  
341 knowledge through the data interpretation. Finally, to the Universidad de Los Andes,  
342 MinCiencias (Ministry of Science, Technology and Innovation), Colombia, for financing the  
343 study, within the program "Observatory of microbioerosion, ocean acidification and dissolution  
344 in coral reefs" code 1204-852-70251 and Facultad de Ciencias-Uniandes (Proyecto Semilla) for  
345 financing the study. We also acknowledge the participation of local communities during the field  
346 surveys.

347

## 348 **FUNDING STATEMENT**

349

350 This study was funded by MINCIENCIAS –Colombia grant program “Observatory of  
351 microbioerosion, ocean acidification and dissolution in coral reefs” code 1204-852-70251,  
352 Vicerrectoria de Investigaciones, Proyecto Semilla from Universidad de los Andes, and a British  
353 Council (UK) small grant via Manchester University project “Improving the local management of  
354 tropical coastal resources in the face of climate change for economic wellbeing of local and  
355 vulnerable communities”. We also acknowledge the agreements with Parques Nacionales and  
356 Oceanario-CEINER Islas del Rosario (Observatorio de Microbioerosion Marina), 2022. We also  
357 thank the participation of local communities during the field surveys.

358

## 359 **AUTHORS' CONTRIBUTIONS**

360

361 ARB conceived and designed the analysis, collected the data, performed the phylogenetic  
362 analysis, conducted part of the field trips and performed laboratory procedures and wrote the  
363 manuscript.

364

365 JSGV contributed with data, literature review and performed laboratory procedures.

366

367 LMD reviewing, editing and writing

368

369 SRP did field planning and sampling, DNA extraction and quantification, PCR amplification and  
370 reviewed the manuscript.

371

372 JAS conceived the study, contributed with data, and reviewed substantially the manuscript.

373

374 All authors reviewed the final manuscript.

375

## 376 **CONFLICTS OF INTEREST**

377

378 The authors' do not declare conflicts of interest.

379

## 380 **LITERATURE CITED**

381

382 Boilard, A., Dubé, C. E., Gruet, C., Mercière, A., Hernandez-Agreda, A., & Derome, N. (2020). Defining Coral Bleaching as a  
383 Microbial Dysbiosis within the Coral Holobiont. *Microorganisms*, 8(11), 1682.

384 <https://doi.org/10.3390/microorganisms8111682>

385 Bornet, Mm. Ed., & Flahault, Ch. (1889). Sur Quelques Plantes Vivant Dans Le Test Calcaire Des Mollusques. *Bulletin de la*  
386 *Société Botanique de France*, 36(10), CXLVII–CLXXVI. <https://doi.org/10.1080/00378941.1889.10835893>

387 Bongaerts, P., Frade, P. R., Ogier, J. J., Hay, K. B., van Bleijswijk, J., Englebert, N., Vermeij, M. J., Bak, R. P., Visser, P. M., &  
388 Hoegh-Guldberg, O. (2013). Sharing the slope: Depth partitioning of agariciid corals and associated

389 Symbiodinium across shallow and mesophotic habitats (2–60 m) on a Caribbean reef. *BMC Evolutionary Biology*, 13(1),  
390 205. <https://doi.org/10.1186/1471-2148-13-205>

391 Bouckaert, R., Vaughan, T. G., Barido-Sottani, J., Duchêne, S., Fourment, M., Gavryushkina, A., Heled, J., Jones, G., Kühnert,  
392 D., De Maio, N., Matschiner, M., Mendes, F. K., Müller, N. F., Ogilvie, H. A., du Plessis, L., Popinga, A., Rambaut, A.,  
393 Rasmussen, D., Siveroni, I., ... Drummond, A. J. (2019). BEAST 2.5: An advanced software platform for Bayesian  
394 evolutionary analysis. *PLOS Computational Biology*, 15(4), e1006650. <https://doi.org/10.1371/journal.pcbi.1006650>

- 395 Bourne, D. G., Morrow, K. M., & Webster, N. S. (2016). Insights into the Coral Microbiome: Underpinning the Health and  
396 Resilience of Reef Ecosystems. *Annual Review of Microbiology*, 70, 317–340. [https://doi.org/10.1146/annurev-micro-](https://doi.org/10.1146/annurev-micro-102215-095440)  
397 [102215-095440](https://doi.org/10.1146/annurev-micro-102215-095440)
- 398 Cremen, Ma. C. M., Leliaert, F., West, J., Lam, D. W., Shimada, S., Lopez-Bautista, J. M., & Verbruggen, H. (2019).  
399 Reassessment of the classification of Bryopsidales (Chlorophyta) based on chloroplast phylogenomic analyses.  
400 *Molecular Phylogenetics and Evolution*, 130, 397–405. <https://doi.org/10.1016/j.ympev.2018.09.009>
- 401 del Campo, J., Pombert, J.-F., Šlapeta, J., Larkum, A., & Keeling, P. J. (2017). The ‘other’ coral symbiont: *Ostreobium* diversity  
402 and distribution. *The ISME Journal*, 11(1), 296–299. <https://doi.org/10.1038/ismej.2016.101>
- 403 Fine, M., Roff, G., Ainsworth, T. D., & Hoegh-Guldberg, O. (2006). Phototrophic microendoliths bloom during coral “white  
404 syndrome.” *Coral Reefs*, 25(4), 577–581. <https://doi.org/10.1007/s00338-006-0143-4>
- 405 Fine, M., Steindler, L., & Loya, Y. (2004). Endolithic algae photoacclimate to increased irradiance during coral bleaching. *Marine*  
406 *and Freshwater Research*, 55(1), 115. <https://doi.org/10.1071/MF03120>
- 407 Finney, J. C., Pettay, D. T., Sampayo, E. M., Warner, M. E., Oxenford, H. A., & LaJeunesse, T. C. (2010). The Relative  
408 Significance of Host–Habitat, Depth, and Geography on the Ecology, Endemism, and Speciation of Coral  
409 Endosymbionts in the Genus *Symbiodinium*. *Microbial Ecology*, 60(1), 250–263. [https://doi.org/10.1007/s00248-010-](https://doi.org/10.1007/s00248-010-9681-y)  
410 [9681-y](https://doi.org/10.1007/s00248-010-9681-y)
- 411 Försterra, G., & Häussermann, V. (2008). Unusual symbiotic relationships between microendolithic phototrophic organisms and  
412 azooxanthellate cold-water corals from Chilean fjords. *Marine Ecology Progress Series*, 370, 121–125.  
413 <https://doi.org/10.3354/meps07630>
- 414 Fujisawa, T., & Barraclough, T. G. (2013). Delimiting Species Using Single-Locus Data and the Generalized Mixed Yule  
415 Coalescent Approach: A Revised Method and Evaluation on Simulated Data Sets. *Systematic Biology*, 62(5), 707–724.  
416 <https://doi.org/10.1093/sysbio/syt033>
- 417 Galindo-Martínez, C. T., Weber, M., Avila-Magaña, V., Enríquez, S., Kitano, H., Medina, M., & Iglesias-Prieto, R. (2022). The  
418 role of the endolithic alga *Ostreobium* spp. During coral bleaching recovery. *Scientific Reports*, 12(1), 2977.  
419 <https://doi.org/10.1038/s41598-022-07017-6>
- 420 Gonzalez-Zapata, F. L., Gómez-Osorio, S., & Sánchez, J. A. (2018). Conspicuous endolithic algal associations in a mesophotic  
421 reef-building coral. *Coral Reefs*, 37(3), 705–709. <https://doi.org/10.1007/s00338-018-1695-9>
- 422 Gutner-Hoch, E., & Fine, M. (2011). Genotypic diversity and distribution of *Ostreobium quekettii* within scleractinian corals.  
423 *Coral Reefs*, 30(3), 643–650. <https://doi.org/10.1007/s00338-011-0750-6>
- 424 Iha, C., Dougan, K. E., Varela, J. A., Avila, V., Jackson, C. J., Bogaert, K. A., Chen, Y., Judd, L. M., Wick, R., Holt, K. E.,  
425 Pasella, M. M., Ricci, F., Repetti, S. I., Medina, M., Marcelino, V. R., Chan, C. X., & Verbruggen, H. (2021). Genomic  
426 adaptations to an endolithic lifestyle in the coral-associated alga *Ostreobium*. *Current Biology*, 31(7), 1393-1402.e5.  
427 <https://doi.org/10.1016/j.cub.2021.01.018>
- 428 Lukas, K. J. (1974). TWO SPECIES OF THE CHLOROPHYTE GENUS *OSTREOBIUM* FROM SKELETONS OF ATLANTIC  
429 AND CARIBBEAN REEF CORALS 1, 2. *Journal of Phycology*, 10(3), 331–335. [https://doi.org/10.1111/j.1529-](https://doi.org/10.1111/j.1529-8817.1974.tb02722.x)  
430 [8817.1974.tb02722.x](https://doi.org/10.1111/j.1529-8817.1974.tb02722.x)
- 431 Kitahara, M. V., Cairns, S. D., Stolarski, J., Blair, D., & Miller, D. J. (2010). A Comprehensive Phylogenetic Analysis of the  
432 Scleractinia (Cnidaria, Anthozoa) Based on Mitochondrial CO1 Sequence Data. *PLoS ONE*, 5(7), e11490.  
433 <https://doi.org/10.1371/journal.pone.0011490>
- 434 Kumar, S., Stecher, G., Li, M., Knyaz, C., & Tamura, K. (2018). MEGA X: Molecular Evolutionary Genetics Analysis across  
435 Computing Platforms. *Molecular Biology and Evolution*, 35(6), 1547–1549. <https://doi.org/10.1093/molbev/msy096>

- 436 López-Londoño, T., Galindo-Martínez, C. T., Gómez-Campo, K., González-Guerrero, L. A., Roitman, S., Pollock, F. J., Pizarro,  
437 V., López-Victoria, M., Medina, M., & Iglesias-Prieto, R. (2021). Physiological and ecological consequences of the  
438 water optical properties degradation on reef corals. *Coral Reefs*, *40*(4), 1243–1256. [https://doi.org/10.1007/s00338-021-](https://doi.org/10.1007/s00338-021-02133-7)  
439 [02133-7](https://doi.org/10.1007/s00338-021-02133-7)
- 440 Loreau, M., & de Mazancourt, C. (2013). Biodiversity and ecosystem stability: A synthesis of underlying mechanisms. *Ecology*  
441 *Letters*, *16*, 106–115. <https://doi.org/10.1111/ele.12073>
- 442 Luo, A., Ling, C., Ho, S. Y. W., & Zhu, C.-D. (2018). Comparison of Methods for Molecular Species Delimitation Across a  
443 Range of Speciation Scenarios. *Systematic Biology*, *67*(5), 830–846. <https://doi.org/10.1093/sysbio/syy011>
- 444 Marcelino, V. R., Morrow, K. M., Oppen, M. J. H., Bourne, D. G., & Verbruggen, H. (2017). Diversity and stability of coral  
445 endolithic microbial communities at a naturally high  $p\text{CO}_2$  reef. *Molecular Ecology*, *26*(19), 5344–5357.  
446 <https://doi.org/10.1111/mec.14268>
- 447 Marcelino, V. R., & Verbruggen, H. (2016). Multi-marker metabarcoding of coral skeletons reveals a rich microbiome and  
448 diverse evolutionary origins of endolithic algae. *Scientific Reports*, *6*(1). <https://doi.org/10.1038/srep31508>
- 449 Massé, A., Domart-Coulon, I., Golubic, S., Duché, D., & Tribollet, A. (2018). Early skeletal colonization of the coral holobiont  
450 by the microboring Ulvophyceae *Ostreobium* sp. *Scientific Reports*, *8*(1). <https://doi.org/10.1038/s41598-018-20196-5>
- 451 Massé, A., Tribollet, A., Meziane, T., Bourguet-Kondracki, M. L., Yéprémian, C., Sève, C., Thiney, N., Longeon, A., Couté, A.,  
452 & Domart-Coulon, I. (2020). *Functional diversity of microboring *Ostreobium* algae isolated from corals* [Preprint].  
453 Microbiology. <https://doi.org/10.1101/2020.09.18.303545>
- 454 Navas-Camacho, R., Gil-Agudelo, D. L., Rodríguez-Ramírez, A., Reyes-Nivia, M. C., & Garzón-Ferreira, J. (2015). Coral  
455 diseases and bleaching on Colombian Caribbean coral reefs. *Revista de Biología Tropical*, *58*(1), 95.  
456 <https://doi.org/10.15517/rbt.v58i1.20026>
- 457 Peixoto, R. S., Rosado, P. M., Leite, D. C. de A., Rosado, A. S., & Bourne, D. G. (2017). Beneficial Microorganisms for Corals  
458 (BMC): Proposed Mechanisms for Coral Health and Resilience. *Frontiers in Microbiology*, *0*.  
459 <https://doi.org/10.3389/fmicb.2017.00341>
- 460 Ricci, F., Rossetto Marcelino, V., Blackall, L. L., Kühn, M., Medina, M., & Verbruggen, H. (2019). Beneath the surface:  
461 Community assembly and functions of the coral skeleton microbiome. *Microbiome*, *7*(1), 159.  
462 <https://doi.org/10.1186/s40168-019-0762-y>
- 463 Rouzé, H., Galand, P. E., Medina, M., Bongaerts, P., Pichon, M., Pérez-Rosales, G., Torda, G., Moya, A., Raina, J.-B., &  
464 Hédouin, L. (2021). Symbiotic associations of the deepest recorded photosynthetic scleractinian coral (172 m depth).  
465 *The ISME Journal*, *15*(5), 1564–1568. <https://doi.org/10.1038/s41396-020-00857-y>
- 466 Sauvage, T., Schmidt, W. E., Suda, S., & Fredericq, S. (2016). A metabarcoding framework for facilitated survey of endolithic  
467 phototrophs with tufA. *BMC Ecology*, *16*(1). <https://doi.org/10.1186/s12898-016-0068-x>
- 468 Stamatakis, A. (2014). RAxML version 8: A tool for phylogenetic analysis and post-analysis of large phylogenies. *Bioinformatics*,  
469 *30*(9), 1312–1313. <https://doi.org/10.1093/bioinformatics/btu033>
- 470 Tandon, K., Pasella, M. M., Iha, C., Ricci, F., Hu, J., O’Kelly, C. J., Medina, M., Kühn, M., & Verbruggen, H. (2023). Every  
471 refuge has its price: *Ostreobium* as a model for understanding how algae can live in rock and stay in business. *Seminars*  
472 *in Cell & Developmental Biology*, *134*, 27–36. <https://doi.org/10.1016/j.semcdb.2022.03.010>
- 473 Velásquez, J., & Sánchez, J. A. (2015). Octocoral Species Assembly and Coexistence in Caribbean Coral Reefs. *PLOS ONE*,  
474 *10*(7), e0129609. <https://doi.org/10.1371/journal.pone.0129609>
- 475 Verbruggen, H., & Tribollet, A. (2011). Boring algae. *Current Biology*, *21*(21), R876–R877.  
476 <https://doi.org/10.1016/j.cub.2011.09.014>
- 477 Veron, J. E. N. (2000). *Corals of the world*. 1 (1. publ). Australian Institute of Marine Science.



- 478 Woolstra, C. R., Quigley, K. M., Davies, S. W., Parkinson, J. E., Peixoto, R. S., Aranda, M., Baker, A. C., Barno, A. R., Barshis,  
479 D. J., Benzoni, F., Bonito, V., Bourne, D. G., Buitrago-López, C., Bridge, T. C. L., Chan, C. X., Combosch, D. J.,  
480 Craggs, J., Frommlet, J. C., Herrera, S., ... Sweet, M. (2021). Consensus Guidelines for Advancing Coral Holobiont  
481 Genome and Specimen Voucher Deposition. *Frontiers in Marine Science*, 8, 701784.  
482 <https://doi.org/10.3389/fmars.2021.701784>
- 483 Wells, J. W. (n.d.). NEW AND OLD SCLERACTINIAN CORALS FROM JAMAICA. *Bulletin of Marine Science*, 43.
- 484 Zhang, J., Kapli, P., Pavlidis, P., & Stamatakis, A. (2013). A general species delimitation method with applications to  
485 phylogenetic placements. *Bioinformatics*, 29(22), 2869–2876. <https://doi.org/10.1093/bioinformatics/btt499>
- 486
